# Supplementary material for: Exploiting human immune repertoire transgenic mice for protective monoclonal antibodies against antimicrobial resistant Acinetobacter baumannii
Source: PubMed Central journal article supplement — Nat Commun. 2024 Sep 12;15:7979. doi: 10.1038/s41467-024-52357-8 (PMC11392949; doi:10.1038/s41467-024-52357-8), 2024-09-12
Supplement: 41467_2024_52357_MOESM3_ESM.pdf [file 41467_2024_52357_MOESM3_ESM.pdf]

## Reporting Summary

Nature Portfolio wishes to improve the reproducibility of the work that we publish. This form provides structure for consistency and transparency in reporting. For further information on Nature Portfolio policies, see our [Editorial Policies](#) and the [Editorial Policy Checklist](#).

### Statistics

For all statistical analyses, confirm that the following items are present in the figure legend, table legend, main text, or Methods section.

- |                                     |                                                                                                                                                                                                                                                                                                |
|-------------------------------------|------------------------------------------------------------------------------------------------------------------------------------------------------------------------------------------------------------------------------------------------------------------------------------------------|
| n/a                                 | Confirmed                                                                                                                                                                                                                                                                                      |
| <input type="checkbox"/>            | <input checked="" type="checkbox"/> The exact sample size ( $n$ ) for each experimental group/condition, given as a discrete number and unit of measurement                                                                                                                                    |
| <input checked="" type="checkbox"/> | <input type="checkbox"/> A statement on whether measurements were taken from distinct samples or whether the same sample was measured repeatedly                                                                                                                                               |
| <input type="checkbox"/>            | <input checked="" type="checkbox"/> The statistical test(s) used AND whether they are one- or two-sided<br><i>Only common tests should be described solely by name; describe more complex techniques in the Methods section.</i>                                                               |
| <input checked="" type="checkbox"/> | <input type="checkbox"/> A description of all covariates tested                                                                                                                                                                                                                                |
| <input type="checkbox"/>            | <input checked="" type="checkbox"/> A description of any assumptions or corrections, such as tests of normality and adjustment for multiple comparisons                                                                                                                                        |
| <input type="checkbox"/>            | <input checked="" type="checkbox"/> A full description of the statistical parameters including central tendency (e.g. means) or other basic estimates (e.g. regression coefficient) AND variation (e.g. standard deviation) or associated estimates of uncertainty (e.g. confidence intervals) |
| <input type="checkbox"/>            | <input checked="" type="checkbox"/> For null hypothesis testing, the test statistic (e.g. $F$ , $t$ , $r$ ) with confidence intervals, effect sizes, degrees of freedom and $P$ value noted<br><i>Give <math>P</math> values as exact values whenever suitable.</i>                            |
| <input checked="" type="checkbox"/> | <input type="checkbox"/> For Bayesian analysis, information on the choice of priors and Markov chain Monte Carlo settings                                                                                                                                                                      |
| <input checked="" type="checkbox"/> | <input type="checkbox"/> For hierarchical and complex designs, identification of the appropriate level for tests and full reporting of outcomes                                                                                                                                                |
| <input checked="" type="checkbox"/> | <input type="checkbox"/> Estimates of effect sizes (e.g. Cohen's $d$ , Pearson's $r$ ), indicating how they were calculated                                                                                                                                                                    |

*Our web collection on [statistics for biologists](#) contains articles on many of the points above.*

### Software and code

Policy information about [availability of computer code](#)

Data collection

Data analysis

For manuscripts utilizing custom algorithms or software that are central to the research but not yet described in published literature, software must be made available to editors and reviewers. We strongly encourage code deposition in a community repository (e.g. GitHub). See the Nature Portfolio [guidelines for submitting code & software](#) for further information.

### Data

Policy information about [availability of data](#)

All manuscripts must include a [data availability statement](#). This statement should provide the following information, where applicable:

- Accession codes, unique identifiers, or web links for publicly available datasets
- A description of any restrictions on data availability
- For clinical datasets or third party data, please ensure that the statement adheres to our [policy](#)

All VH/VL paired sequences used to synthesize monoclonal antibodies and using the same unique identifiers in the manuscript are available via the published patent filing WO2023094628A1. A full list of all 951 VH/VL sequences generated in the study is included in the source data file.

## Research involving human participants, their data, or biological material

Policy information about studies with [human participants or human data](#). See also policy information about [sex, gender \(identity/presentation\), and sexual orientation](#) and [race, ethnicity and racism](#).

|                                                                    |                                                                                                                                                                                                                                                                                                                                                                                                                                                                                                                                                                                                                                                                                                                                                                                                                                                                                                                                                                                                                                              |
|--------------------------------------------------------------------|----------------------------------------------------------------------------------------------------------------------------------------------------------------------------------------------------------------------------------------------------------------------------------------------------------------------------------------------------------------------------------------------------------------------------------------------------------------------------------------------------------------------------------------------------------------------------------------------------------------------------------------------------------------------------------------------------------------------------------------------------------------------------------------------------------------------------------------------------------------------------------------------------------------------------------------------------------------------------------------------------------------------------------------------|
| Reporting on sex and gender                                        | Details on reporting of sex and gender for clinical studies from which bacteria and associated patient metadata were used in this study are detailed in the following publications.<br>Schultz et al. Repeated local emergence of carbapenem-resistant <i>Acinetobacter baumannii</i> in a single hospital ward. <i>Microb Genom</i> 2, e000050 (2016).<br>Toan, N. D. et al. Clinical and laboratory factors associated with neonatal sepsis mortality at a major Vietnamese children's hospital. <i>Plos Global Public Heal</i> 2, e0000875 (2022).<br>Roberts, L. W. et al. Genomic characterisation of multidrug-resistant <i>Escherichia coli</i> , <i>Klebsiella pneumoniae</i> , and <i>Acinetobacter baumannii</i> in two intensive care units in Hanoi, Viet Nam: a prospective observational cohort study. <i>The Lancet Microbe</i> 3, e857–e866 (2022).<br>Sex and gender based analyses related to strain and patient metadata were not considered for study of monoclonal antibody binding described in the reported research. |
| Reporting on race, ethnicity, or other socially relevant groupings | Details on reporting of race, ethnicity, or other socially relevant groupings for clinical studies from which bacteria and associated patient metadata were used in this study are detailed in the publications listed above. These analyses were not considered for study of monoclonal antibody binding described in the reported research.                                                                                                                                                                                                                                                                                                                                                                                                                                                                                                                                                                                                                                                                                                |
| Population characteristics                                         | See above                                                                                                                                                                                                                                                                                                                                                                                                                                                                                                                                                                                                                                                                                                                                                                                                                                                                                                                                                                                                                                    |
| Recruitment                                                        | Participants were recruited as described in the publications listed above.                                                                                                                                                                                                                                                                                                                                                                                                                                                                                                                                                                                                                                                                                                                                                                                                                                                                                                                                                                   |
| Ethics oversight                                                   | Ethical oversight for clinical protocols for studies from which from which bacteria and associated patient metadata were used in this study are detailed in the publications listed above.                                                                                                                                                                                                                                                                                                                                                                                                                                                                                                                                                                                                                                                                                                                                                                                                                                                   |

Note that full information on the approval of the study protocol must also be provided in the manuscript.

## Field-specific reporting

Please select the one below that is the best fit for your research. If you are not sure, read the appropriate sections before making your selection.

Life sciences       Behavioural & social sciences       Ecological, evolutionary & environmental sciences

For a reference copy of the document with all sections, see [nature.com/documents/nr-reporting-summary-flat.pdf](https://nature.com/documents/nr-reporting-summary-flat.pdf)

## Life sciences study design

All studies must disclose on these points even when the disclosure is negative.

|                 |                                                                                                                                                                                                                                                                                                                                                                                                                                                                                                                                                                                                      |
|-----------------|------------------------------------------------------------------------------------------------------------------------------------------------------------------------------------------------------------------------------------------------------------------------------------------------------------------------------------------------------------------------------------------------------------------------------------------------------------------------------------------------------------------------------------------------------------------------------------------------------|
| Sample size     | For all animal studies, study size was defined in each institutional animal protocol (see online methods section Mouse immunisations and Murine challenge studies) according to power calculations for delivery of a conclusive outcome (n=5). For all in vitro studies a minimum sample size of n=4 was employed in all cases. Sample size was maximised to n=6 whenever possible. These sample sizes were selected to maximise power of the statistical test used for analysis of in vitro data (Mann Whitney for comparison two groups of or Dunnett's one-way ANOVA to compare multiple groups). |
| Data exclusions | No data was excluded from any of the analyses.                                                                                                                                                                                                                                                                                                                                                                                                                                                                                                                                                       |
| Replication     | Individual experiments were repeated three times to assess reproducibility and an individual representative experiment was presented. We confirm that all repetitions of experiments successfully delivered data representative of those presented in the manuscript.                                                                                                                                                                                                                                                                                                                                |
| Randomization   | Random allocation of samples into experimental groups were not relevant as samples were derived from defined experimental groups for the in vivo and in vitro studies presented.                                                                                                                                                                                                                                                                                                                                                                                                                     |
| Blinding        | Blinding was not relevant in this study as samples were derived from defined experimental groups for the in vivo and in vitro studies presented.                                                                                                                                                                                                                                                                                                                                                                                                                                                     |

## Reporting for specific materials, systems and methods

We require information from authors about some types of materials, experimental systems and methods used in many studies. Here, indicate whether each material, system or method listed is relevant to your study. If you are not sure if a list item applies to your research, read the appropriate section before selecting a response.

## Materials &amp; experimental systems

## Methods

|                                     |                                                                 |
|-------------------------------------|-----------------------------------------------------------------|
| n/a                                 | Involved in the study                                           |
| <input type="checkbox"/>            | <input checked="" type="checkbox"/> Antibodies                  |
| <input type="checkbox"/>            | <input checked="" type="checkbox"/> Eukaryotic cell lines       |
| <input checked="" type="checkbox"/> | <input type="checkbox"/> Palaeontology and archaeology          |
| <input type="checkbox"/>            | <input checked="" type="checkbox"/> Animals and other organisms |
| <input checked="" type="checkbox"/> | <input type="checkbox"/> Clinical data                          |
| <input checked="" type="checkbox"/> | <input type="checkbox"/> Dual use research of concern           |
| <input checked="" type="checkbox"/> | <input type="checkbox"/> Plants                                 |

|                                     |                                                 |
|-------------------------------------|-------------------------------------------------|
| n/a                                 | Involved in the study                           |
| <input checked="" type="checkbox"/> | <input type="checkbox"/> ChIP-seq               |
| <input checked="" type="checkbox"/> | <input type="checkbox"/> Flow cytometry         |
| <input checked="" type="checkbox"/> | <input type="checkbox"/> MRI-based neuroimaging |

## Antibodies

## Antibodies used

Information given below is as follows, antibody, application, supplier, Cat#, clone name, Lot#, dilution used.

BUV-395-B220, Cell sorting, BD Biosciences, 563793, RA3-6b2, 7177756 1/200  
 BUV-395-CD19, Cell sorting, BD Horizon, 563557, 1D3, 8206694 1/200  
 BV451-Anti-Heavy IgG, Cell sorting, BD Horizon, 562581, X40, 9079965 1/40  
 BV650-Anti-Heavy IgM, Cell sorting, Biolegend, 314526, MHM88, B268198 1/100  
 BV510-CD8a, Cell sorting, Biolegend, 100752, 53-6.7, B248151 1/500  
 BV510-CD4, Cell sorting, Biolegend, 100449, GK1.5, B248587 1/500  
 BV510-Ly6G, Cell sorting, Biolegend, 127633, RB6-8C5, B307304 1/500  
 BV510-F4/80, Cell sorting, Biolegend, 123135, BM8, B25669 1/500  
 BV510-CD11c, Cell sorting, BD Biosciences, 562949, HL3, 8011606 1/500  
 PE-Mouse Lambda, Cell sorting, Southern Biotech, 1175-09L, JC5-1, G1714-VL87C 1/200  
 FITC-labelled anti-Guinea pig complement C3 C3b depositon MP Biomedicals 855385  
 PE-conjugated anti-human C3 C3b depositon Cedarlane CL7636PE

## Validation

Validation for each use case is supplied in product note supplied by the manufacturer with the following exceptions. Validation for use of FITC-labelled anti-Guinea Pig complement C3 for C3b deposition described in the manuscript is described in Fischinger et al. A high-throughput, bead-based, antigen-specific assay to assess the ability of antibodies to induce complement activation. J Immunol Methods 473, 112630 (2019).

BUV-395-B220 <https://www.bdbiosciences.com/en-gb/search-results?searchKey=563793#>  
 BV510-CD11c <https://www.bdbiosciences.com/en-gb/search-results?searchKey=562949>  
 BV451-Anti-Heavy IgG <https://www.bdbiosciences.com/en-us/products/reagents/flow-cytometry-reagents/research-reagents/single-color-antibodies-ruo/bv421-mouse-anti-human-igg.562581>  
 BUV-395-CD19 <https://www.bdbiosciences.com/en-us/products/reagents/flow-cytometry-reagents/research-reagents/single-color-antibodies-ruo/buv395-rat-anti-mouse-cd19.563557>  
 BV650-Anti-Heavy IgM <https://www.biolegend.com/en-us/products/brilliant-violet-650-anti-human-igm-antibody-9650>  
 BV510-CD8a <https://www.biolegend.com/en-us/products/brilliant-violet-510-anti-mouse-cd8a-antibody-7992>  
 BV510-CD4 <https://www.biolegend.com/en-us/products/brilliant-violet-510-anti-mouse-cd4-antibody-10707>  
 BV510-Ly6G <https://www.biolegend.com/en-us/products/brilliant-violet-510-anti-mouse-ly-6g-antibody-9121>  
 BV510-F4/80 <https://www.biolegend.com/en-us/products/brilliant-violet-510-anti-mouse-f4-80-antibody-8934>

## Eukaryotic cell lines

Policy information about [cell lines and Sex and Gender in Research](#)

## Cell line source(s)

HEK293 cells (Expi293™, Gibco, Thermo Fisher Scientific, US, Cat-A14635), CHO-3E7 (National Research Council, Canada NRC file 11992), THP-1 (ATCC TIB-202™)

## Authentication

All authentication procedures carried out by supplier indicated for HEK293 cells (Expi293™, Gibco, Thermo Fisher Scientific, US, Cat-A14635), CHO-3E7 (National Research Council, Canada NRC file 11992), THP-1 (ATCC TIB-202™)

## Mycoplasma contamination

All cell lines used tested negatively for mycoplasma

Commonly misidentified lines  
(See [ICLAC](#) register)

No commonly misidentified cell lines were used in this study

## Animals and other research organisms

Policy information about [studies involving animals; ARRIVE guidelines](#) recommended for reporting animal research, and [Sex and Gender in Research](#)

## Laboratory animals

Kymouse platform mice are true-breeding lines is a randomized mixture of 129S7 and C57BL/6J strains, male and female mice were used in this study. Kymouse platform mice were bred at the Biological Support Unit at the Babraham Research Campus, Cambridge

|                         |                                                                                                                                                                                                                                                                                                                                                                                                                                                                                                                                                                                                                                                                   |
|-------------------------|-------------------------------------------------------------------------------------------------------------------------------------------------------------------------------------------------------------------------------------------------------------------------------------------------------------------------------------------------------------------------------------------------------------------------------------------------------------------------------------------------------------------------------------------------------------------------------------------------------------------------------------------------------------------|
|                         | UK. C57BL6J male and female mice, BALB/c male and female mice were purchased from Charles River Laboratories UK. All mice were housed on a 12-h light/dark cycle at 20-24°C with 55%±10% humidity.                                                                                                                                                                                                                                                                                                                                                                                                                                                                |
| Wild animals            | This study did not involve use of wild animals                                                                                                                                                                                                                                                                                                                                                                                                                                                                                                                                                                                                                    |
| Reporting on sex        | Findings presented in this study do not apply to only one sex. No sex-specific analysis of data were performed.                                                                                                                                                                                                                                                                                                                                                                                                                                                                                                                                                   |
| Field-collected samples | This study did not involve samples collected from the field.                                                                                                                                                                                                                                                                                                                                                                                                                                                                                                                                                                                                      |
| Ethics oversight        | For studies used Kymouse platform mice Mice were housed under United Kingdom Home Office License 70/8718 with all procedures carried out receiving approval of the Wellcome Trust Sanger Institute Animal Welfare and Ethical Review Body. Mouse studies carried out at Imperial College were performed under United Kingdom Home Office License PP5168779 and were approved by the Animal Welfare and Ethical Review board at Imperial College London. Mouse studies carried out at the University of Cambridge were performed uUnited Kingdom Home Office License P653704A5 with university approval by a local Animal Welfare and Ethical Review Board (AWERB) |

Note that full information on the approval of the study protocol must also be provided in the manuscript.

## Plants

|                       |                                                                                                                                                                                                                                                                                                                                                                                                                                                                                                                                                          |
|-----------------------|----------------------------------------------------------------------------------------------------------------------------------------------------------------------------------------------------------------------------------------------------------------------------------------------------------------------------------------------------------------------------------------------------------------------------------------------------------------------------------------------------------------------------------------------------------|
| Seed stocks           | <i>Report on the source of all seed stocks or other plant material used. If applicable, state the seed stock centre and catalogue number. If plant specimens were collected from the field, describe the collection location, date and sampling procedures.</i>                                                                                                                                                                                                                                                                                          |
| Novel plant genotypes | <i>Describe the methods by which all novel plant genotypes were produced. This includes those generated by transgenic approaches, gene editing, chemical/radiation-based mutagenesis and hybridization. For transgenic lines, describe the transformation method, the number of independent lines analyzed and the generation upon which experiments were performed. For gene-edited lines, describe the editor used, the endogenous sequence targeted for editing, the targeting guide RNA sequence (if applicable) and how the editor was applied.</i> |
| Authentication        | <i>Describe any authentication procedures for each seed stock used or novel genotype generated. Describe any experiments used to assess the effect of a mutation and, where applicable, how potential secondary effects (e.g. second site T-DNA insertions, mosaicism, off-target gene editing) were examined.</i>                                                                                                                                                                                                                                       |
